# Supplementary material for: Computational Methods to Predict Conformational B-cell Epitopes
Source: Preprints.org preprint supplement (doi:10.20944/preprints202407.0943.v1), 2024-07-11
Supplement: Supplementary file 2 [file supplementary]

Table A1: PDB IDs of bound antigens on the test set along with the PDB IDs of analogous unbound antigens, total number of epitopic residues on the unbound antigen and the residue numbers of these residues.

| **Bound_Antigen_PDB_ID** | **Unbound_Antigen_PDB_ID** | **Number of Epitope Residues** | **Epitope Residue Numbers on the Unbound Antigen** |
| --- | --- | --- | --- |
| 7DUO | 2EF1 | 18 | 120+121+135+139+141+142+202+203+205+236+237+239+241+272+273+274+275+276 |
| 5BO1 | 2VJ2 | 18 | 190+201+202+203+204+205+206+207+209+211+219+221+222+224+246+247+250+252 |
| 3O2D | 1WIO | 18 | 3+94+96+120+122+123+124+125+126+127+140+141+142+162+163+164+165+166 |
| 6P50 | 3UP1 | 15 | 52+54+55+59+61+62+84+85+86+88+93+94+95+98+100 |
| 4RRP | 1WG3 | 23 | 17+18+19+20+21+22+23+24+27+28+30+32+35+67+68+69+70+73+77+78+79+80+82 |
| 3LDB | 3K2O | 13 | 53+55+57+58+61+62+65+158+291+319+320+322+323 |
| 7LFA | 7L6K | 8 | 124+125+127+128+130+132+133+137 |
| 5DHV | 6BSY | 13 | 11+14+15+18+21+22+48+51+55+58+59+62+63 |
| 5H35 | 5WTR | 21 | 1+2+5+6+9+55+57+59+62+107+110+111+113+114+115+164+168+169+172+173+176 |
| 4KUC | 4Q2V | 13 | 53+92+98+99+101+102+105+106+109+112+113+114+116 |
| 4CMH | 6EDR | 25 | 75+76+79+107+108+110+111+112+113+114+115+116+117+118+119+148+150+194+195+196+198+199+201+233+234 |
| 3PGF | 5EDU | 23 | 195+198+199+200+201+203+206+218+367+409+410+413+416+417+429+432+433+435+436+437+438+439+440 |
| 4JR9 | 4U4W | 11 | 12+15+16+17+19+24+25+27+28+29+32 |
| 4OII | 4OIE | 21 | 232+235+236+237+239+240+253+256+257+258+260+261+262+264+265+289+293+294+314+315+351 |
| 3LEV | 3LES | 9 | 107+108+109+110+111+112+113+116+244 |
| 5CBA | 7JNY | 14 | 20+23+24+26+27+28+29+30+48+50+61+64+65+68 |
| 3MXW | 3M1N | 21 | 44+45+87+123+125+126+131+132+133+134+135+136+147+153+155+174+176+177+178+179+180 |
| 3NH7 | 2K3G | 21 | 43+60+62+64+67+74+77+78+79+80+81+84+86+90+91+92+93+94+95+96+97 |
| 5JQ6 | 1N67 | 21 | 408+428+429+431+432+433+434+460+463+464+465+466+467+468+473+477+479+481+510+512+518 |
| 4ETQ | 4ETQ | 22 | 5+39+40+41+44+174+175+176+177+178+179+204+205+215+217+219+220+221+223+224+226+227 |
| 3KS0 | 1LDC | 10 | 30+63+64+65+66+67+68+69+70+72 |
| 3LD8 | 6MEV | 13 | 53+55+57+58+61+62+65+158+291+319+320+322+326 |
| 3WKM | 3WKL | 24 | 116+117+161+162+165+195+198+200+207+215+216+242+246+250+276+277+278+279+280+281+282+283+288+289 |
| 5FB8 | 1I16 | 19 | 38+39+40+42+43+44+45+46+51+53+63+65+66+94+95+96+97+99+102 |
| 2JEL | 1HDN | 15 | 1+2+3+4+34+41+64+66+67+68+70+71+72+75+76 |
| 2VXQ | 1BMW | 15 | 32+34+39+40+41+43+65+67+68+75+76+77+78+79+80 |
| 4U6V | 6U49 | 16 | 173+179+181+182+183+185+186+187+188+189+190+191+200+263+264+266 |
| 3LIZ | 1YG9 | 18 | 199+200+201+232+233+234+235+236+237+248+250+251+253+254+256+257+270+272 |
| 5MES | 5KU9 | 12 | 174+205+208+308+309+310+311+313+317+318+320+322 |
